# Supplementary material for: Heterogeneous impacts of fire-sourced ozone (O 3 ) pollution on global crop yields in the future climate scenarios
Source: Copernicus journal article supplement (doi:10.5194/egusphere-2025-847), 2025-06-12
Supplement: Supplementary file 1 [file egusphere-2025-847-supplement.pdf]

# ***Supplementary Information***

**Title:** Heterogeneous impacts of fire-sourced ozone (O<sub>3</sub>) pollution on global crop yields in the future climate scenarios

**Authors:** Rui Li<sup>a, b</sup>, Dongmei Tang<sup>a, b, \*</sup>, Yumeng Shao<sup>a</sup>, Yining Gao<sup>a</sup>, Hongfang Zhao<sup>a, \*</sup>

**Affiliations:** <sup>a</sup> *Key Laboratory of Geographic Information Science of the Ministry of Education, School of Geographic Sciences, East China Normal University, Shanghai, 200241, PR China*

<sup>b</sup> *Institute of Eco-Chongming (IEC), 20 Cuiniao Road, Chenjia Town, Chongming District, Shanghai, 202162, China*

**\* Corresponding author**

Prof. Tang (dmtang@geo.ecnu.edu.cn) and Prof. Zhao (hfzhao@geo.ecnu.edu.cn)

Number of pages: 14

Number of figures: 10

Number of tables: 1

Three statistical indicators including determination coefficient ( $R^2$ ), root mean square error (RMSE), and mean absolute error (MAE) were applied to validate the modelling performances of ambient MDA8 O<sub>3</sub> concentration (Li et al., 2019; Li et al., 2023).  $P_i$  and  $O_i$  represent the predicted and observed concentrations, respectively. SSR and SST represent the regression sum of squares and total sum of squares, respectively. The detailed equations are as follows:

$$R^2 = \frac{SSR}{SST} \quad (1)$$

$$RMSE = \sqrt{\frac{\sum_{i=1}^N (P_i - O_i)^2}{N}} \quad (2)$$

$$MAE = \sum_{i=1}^N |P_i - O_i| \quad (3)$$

Besides, some redundant variables were also removed in the final model because it might degrade the predictive accuracy of the multi-stage model.

**Table S1** The updated AOT40 response function for major four crops.

|              | Equation                  | References |
|--------------|---------------------------|------------|
| Maize        | $RY = -0.0058AOT40 + 1$   | 1          |
| Rice         | $RY = -0.009489AOT40 + 1$ | 2          |
| Spring wheat | $RY = -0.0205AOT40 + 1$   | 3          |
| Winter wheat | $RY = -0.0205AOT40 + 1$   | 3          |

**Figure S1** The workflow of wildfire-induced O<sub>3</sub> concentration and crop yield loss estimates.

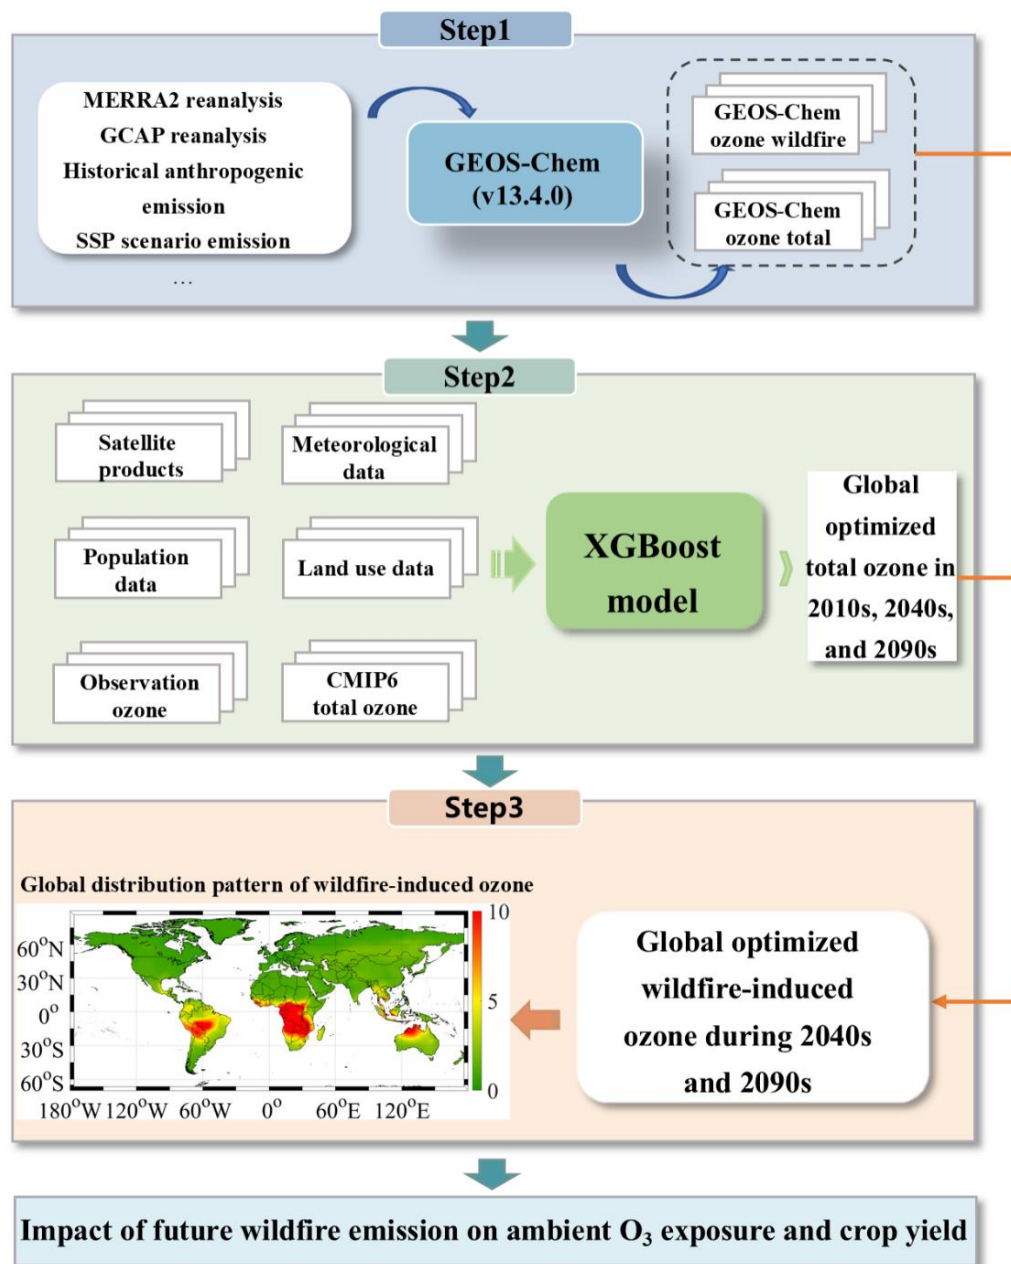

**Figure S2** The predictive accuracy of MDA8 O<sub>3</sub> concentration at the global scale (a). The relationship between fire-sourced MDA8 O<sub>3</sub> level and K<sup>+</sup> concentration (b).

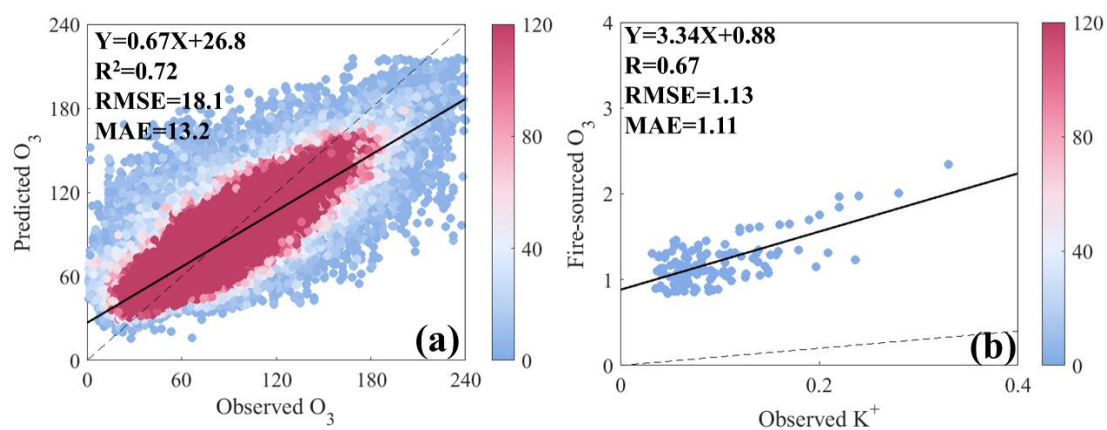

**Figure S3** The global variations of wildfire-induced 8-h  $O_3$  levels (Unit:  $\mu g/m^3$ ) in SSP1-2.6 (a), SSP3-7.0 (b), and SSP5-8.5 (c) scenarios during 2090s. The spatial distributions of wildfire-related 8-h  $O_3$  concentrations (Unit:  $\mu g/m^3$ ) in different regions during 2090s (d). US, SA, and SS represent the United States, South America, and Sub-Saharan Africa, respectively.

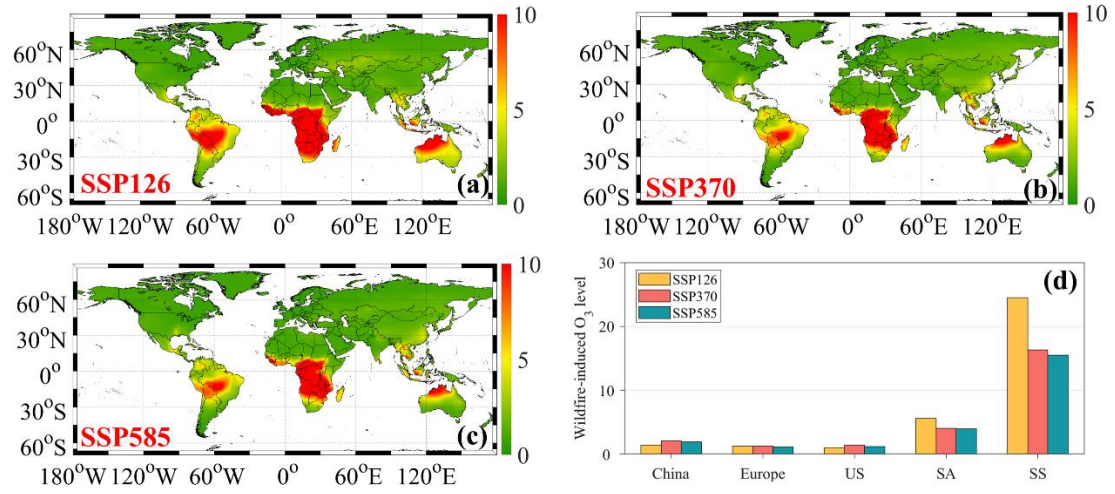

**Figure S4** The global variations of wildfire-induced O<sub>3</sub>-related rice yield losses (Unit: t/km<sup>2</sup>) during historical (a), SSP1-2.6 (b), SSP3-7.0 (d), and SSP5-8.5 (e) scenarios during 2040s, respectively. The spatial variations of wildfire-induced rice yield losses (Unit: t/km<sup>2</sup>) in major regions during 2040s. US, SA, and SS represent the United States, South America, and Sub-Saharan Africa, respectively.

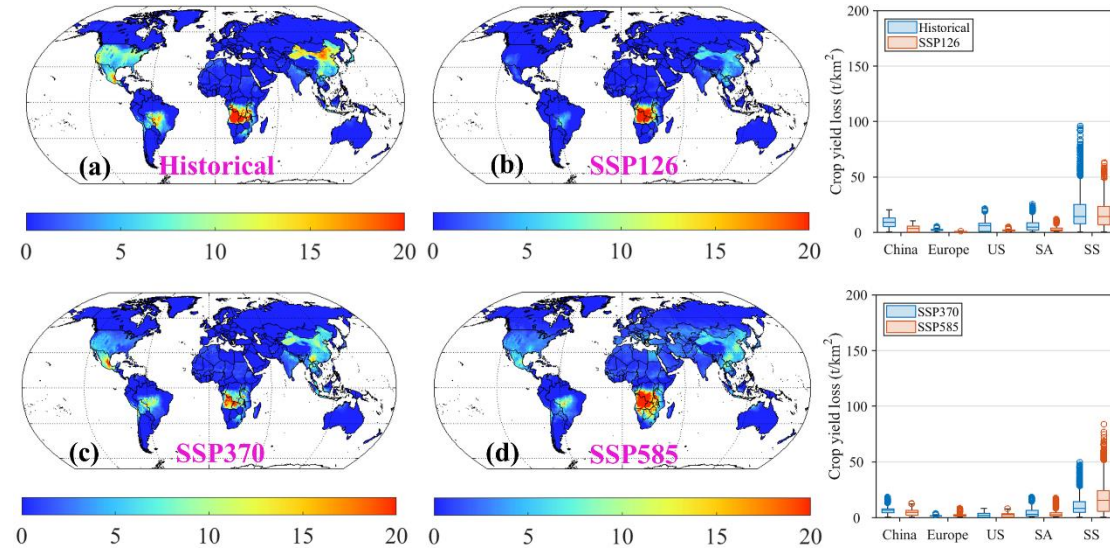

**Figure S5** The global variations of wildfire-induced O<sub>3</sub>-related spring wheat yield losses (Unit: t/km<sup>2</sup>) during historical (a), SSP1-2.6 (b), SSP3-7.0 (d), and SSP5-8.5 (e) scenarios during 2040s, respectively. The spatial variations of wildfire-induced spring wheat yield losses (Unit: t/km<sup>2</sup>) in major regions during 2040s. US, SA, and SS represent the United States, South America, and Sub-Saharan Africa, respectively.

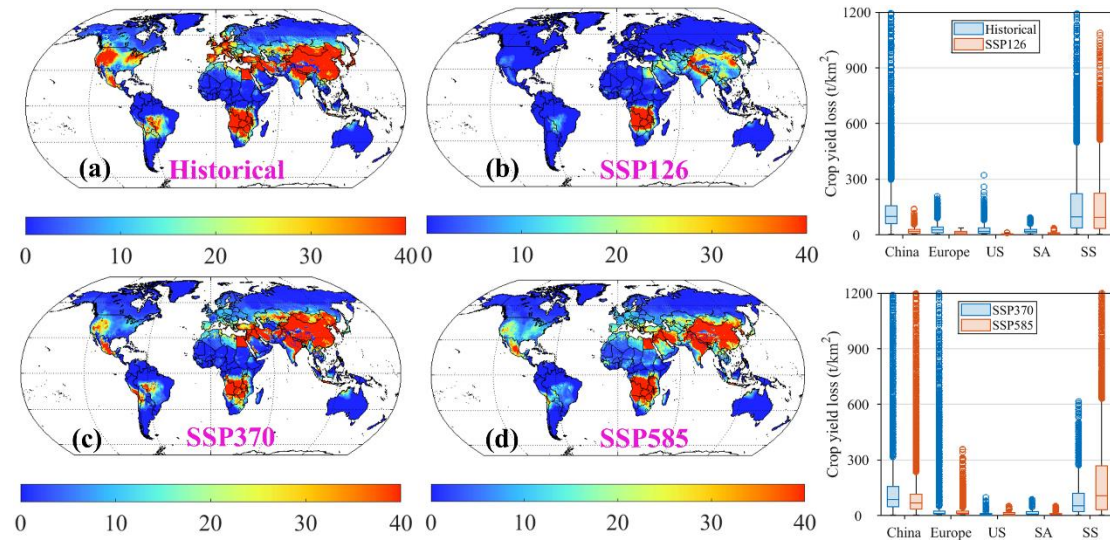



**Figure S6** The global variations of wildfire-induced  $O_3$ -related winter wheat yield losses (Unit:  $t/km^2$ ) during historical (a), SSP1-2.6 (b), SSP3-7.0 (d), and SSP5-8.5 (e) scenarios during 2040s, respectively. The spatial variations of wildfire-induced winter wheat yield losses (Unit:  $t/km^2$ ) in major regions during 2040s. US, SA, and SS represent the United States, South America, and Sub-Saharan Africa, respectively.

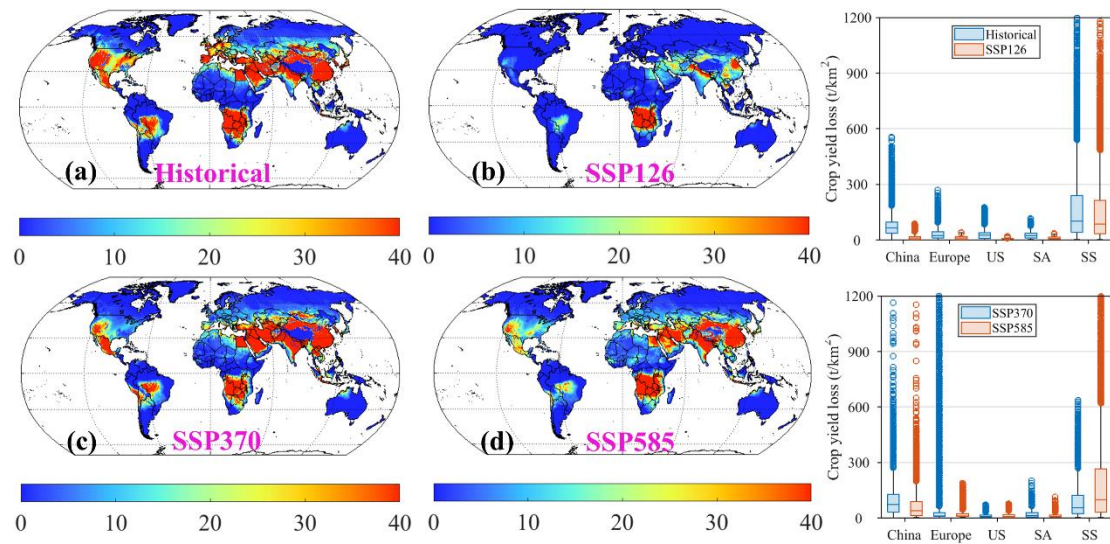

**Figure S7** The global variations of wildfire-induced  $O_3$ -related maize yield losses (Unit:  $t/km^2$ ) during SSP1-2.6 (a), SSP3-7.0 (b), and SSP5-8.5 (c) scenarios during 2090s, respectively. The global difference of wildfire-induced maize yield losses (Unit:  $t/km^2$ ) in different SSP scenarios during 2090s. US, SA, and SS represent the United States, South America, and Sub-Sahara Africa, respectively.

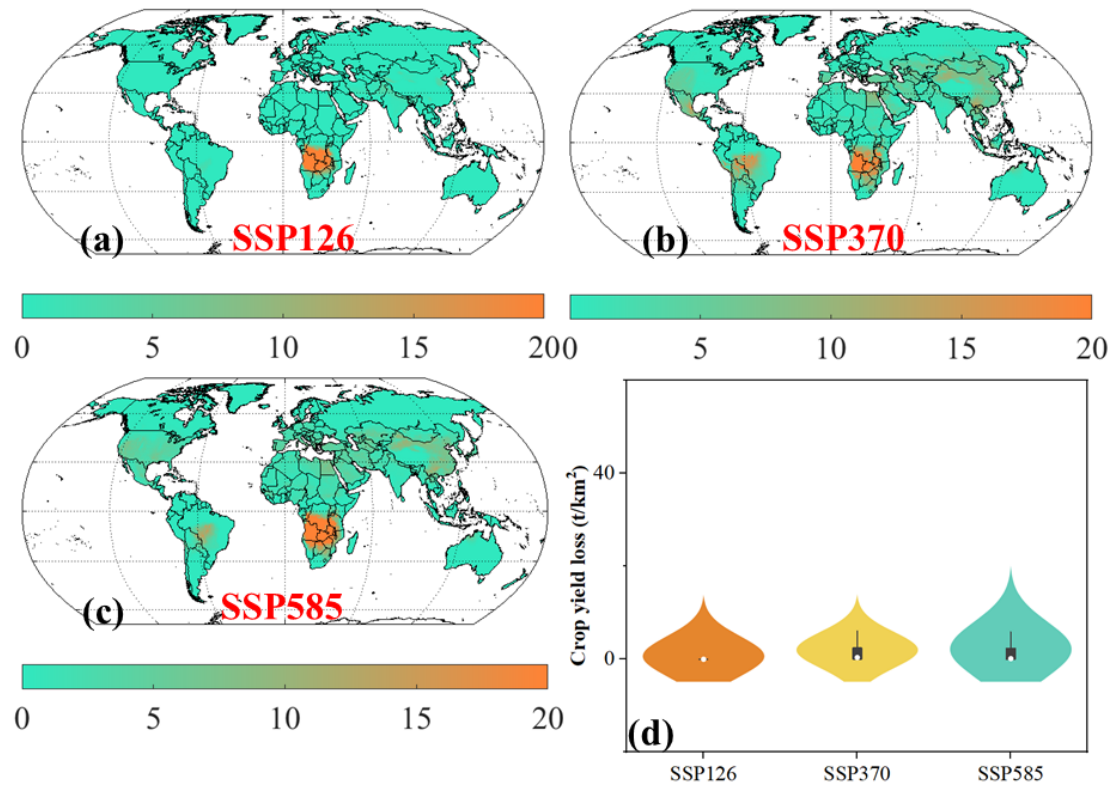

**Figure S8** The global variations of wildfire-induced O<sub>3</sub>-related rice yield losses (Unit: t/km<sup>2</sup>) during SSP1-2.6 (a), SSP3-7.0 (b), and SSP5-8.5 (c) scenarios during 2090s, respectively. The global difference of wildfire-induced rice yield losses (Unit: t/km<sup>2</sup>) in different SSP scenarios during 2090s. US, SA, and SS represent the United States, South America, and Sub-Sahara Africa, respectively.

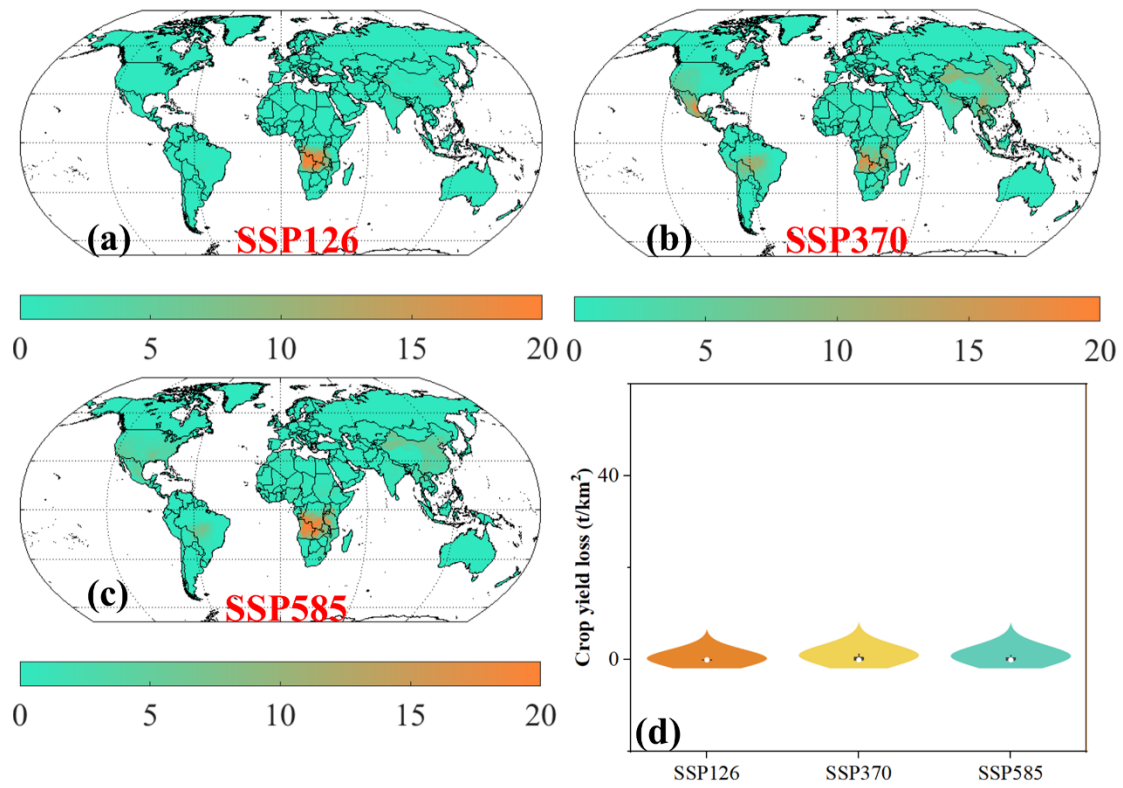

**Figure S9** The global variations of wildfire-induced O<sub>3</sub>-related spring wheat yield losses (Unit: t/km<sup>2</sup>) during SSP1-2.6 (a), SSP3-7.0 (b), and SSP5-8.5 (c) scenarios during 2090s, respectively. The global difference of wildfire-induced spring wheat yield losses (Unit: t/km<sup>2</sup>) in different SSP scenarios during 2090s. US, SA, and SS represent the United States, South America, and Sub-Sahara Africa, respectively.

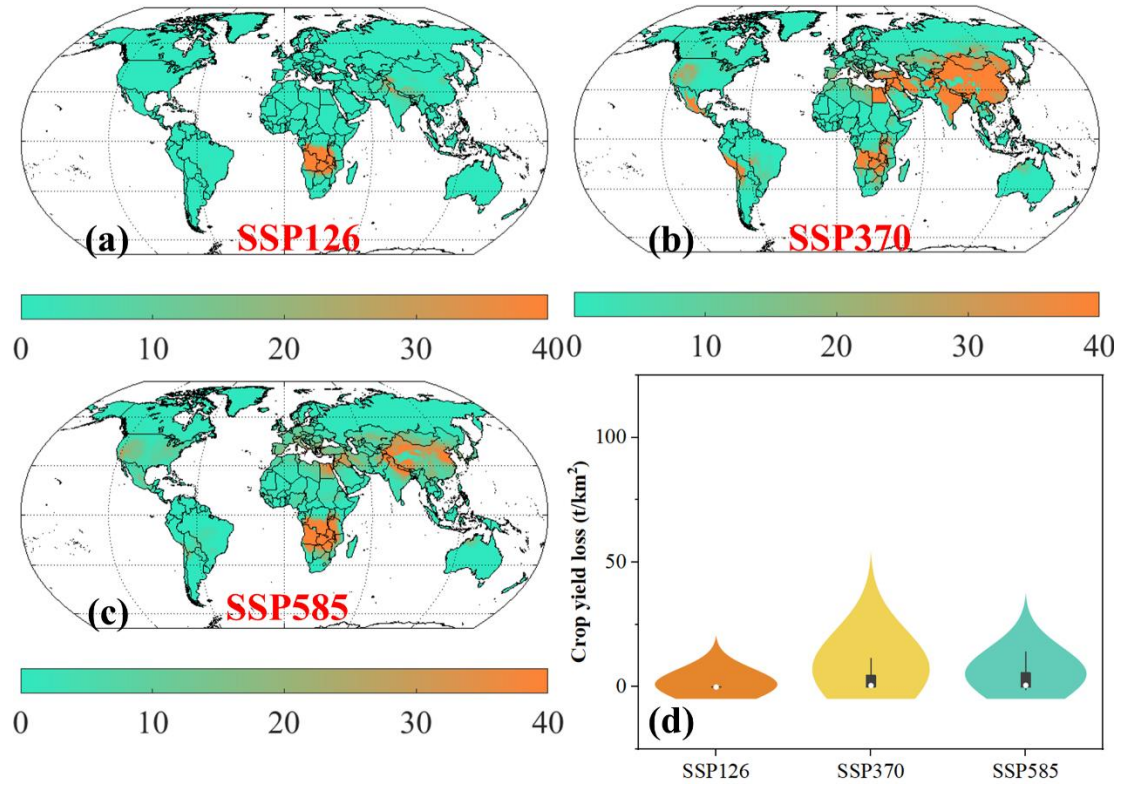

**Figure S10** The global variations of wildfire-induced  $O_3$ -related winter wheat yield losses (Unit:  $t/km^2$ ) during SSP1-2.6 (a), SSP3-7.0 (b), and SSP5-8.5 (c) scenarios during 2090s, respectively. The global difference of wildfire-induced winter wheat yield losses (Unit:  $t/km^2$ ) in different SSP scenarios during 2090s. US, SA, and SS represent the United States, South America, and Sub-Saharan Africa, respectively.

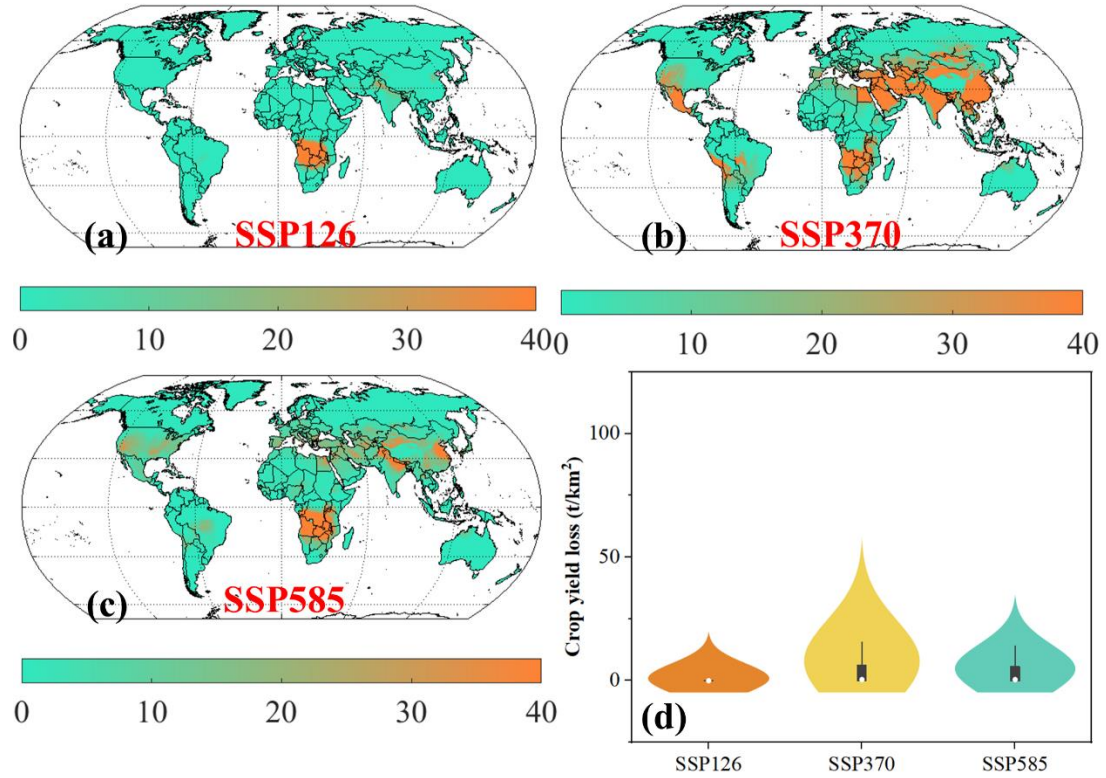

## References

1. Peng, J.; Shang, B.; Xu, Y.; Feng, Z.; Pleijel, H.; Calatayud, V., Ozone exposure-and flux-yield response relationships for maize. *Environmental pollution* **2019**, *252*, 1-7.
2. Wang, X.; Mauzerall, D. L., Characterizing distributions of surface ozone and its impact on grain production in China, Japan and South Korea: 1990 and 2020. *Atmospheric Environment* **2004**, *38*, (26), 4383-4402.
3. Feng, Z.; Kobayashi, K.; Li, P.; Xu, Y.; Tang, H.; Guo, A.; Paoletti, E.; Calatayud, V., Impacts of current ozone pollution on wheat yield in China as estimated with observed ozone, meteorology and day of flowering. *Atmospheric Environment* **2019**, *217*, 116945.
